# Supplementary material for: Identification of evolutionarily stable sites across the SARS-CoV-2 proteome
Source: Research Square preprint supplement (doi:10.21203/rs.3.rs-95030/v1), 2020-10-20
Supplement: Supplementary file 1 [file 5abea4c8f4cee14fcc652ca2.xlsx]

## Sheet: Sheet1
Protein	Amino acid position	Amino acid	ET ranking	100-ET ranking	# of unique variants
E	1	M	24	76	0
E	2	Y	45.3	54.7	1
E	3	S	41.3	58.7	0
E	4	F	14.7	85.3	1
E	5	V	36	64	4
E	6	S	69.3	30.7	1
E	7	E	82.7	17.3	2
E	8	E	40	60	3
E	9	T	68	32	1
E	10	G	9.3	90.7	1
E	11	T	70.7	29.3	0
E	12	L	60	40	0
E	13	I	8	92	0
E	14	V	22.7	77.3	0
E	15	N	10.7	89.3	0
E	16	S	33.3	66.7	1
E	17	V	20	80	1
E	18	L	57.3	42.7	0
E	19	L	44	56	3
E	20	F	52	48	2
E	21	L	49.3	50.7	3
E	22	A	64	36	1
E	23	F	30.7	69.3	1
E	24	V	26.7	73.3	2
E	25	V	56	44	1
E	26	F	81.3	18.7	1
E	27	L	12	88	0
E	28	L	42.7	57.3	1
E	29	V	28	72	1
E	30	T	72	28	2
E	31	L	53.3	46.7	0
E	32	A	5.3	94.7	1
E	33	I	62.7	37.3	1
E	34	L	5.3	94.7	0
E	35	T	13.3	86.7	0
E	36	A	34.7	65.3	1
E	37	L	73.3	26.7	4
E	38	R	21.3	78.7	1
E	39	L	5.3	94.7	1
E	40	C	18.7	81.3	0
E	41	A	58.7	41.3	3
E	42	Y	48	52	0
E	43	C	25.3	74.7	1
E	44	C	85.3	14.7	0
E	45	N	84	16	0
E	46	I	29.3	70.7	1
E	47	V	76	24	1
E	48	N	16	84	1
E	49	V	46.7	53.3	1
E	50	S	37.3	62.7	2
E	51	L	38.7	61.3	1
E	52	V	32	68	1
E	53	K	54.7	45.3	1
E	54	P	5.3	94.7	1
E	55	S	50.7	49.3	1
E	56	F	92	8	0
E	57	Y	17.3	82.7	0
E	58	V	65.3	34.7	2
E	59	Y	6.7	93.3	1
E	60	S	61.3	38.7	0
E	61	R	78.7	21.3	2
E	62	V	74.7	25.3	1
E	63	K	77.3	22.7	0
E	64	N	80	20	2
E	65	L	89.3	10.7	0
E	66	N	88	12	2
E	67	S	96	4	1
E	68	S	97.3	2.7	3
E	69	R	100	0	2
E	70	V	98.7	1.3	1
E	71	P	94.7	5.3	2
E	72	D	93.3	6.7	6
E	73	L	90.7	9.3	2
E	74	L	86.7	13.3	2
E	75	V	66.7	33.3	2
M	1	M	100	0	0
M	2	A	100	0	2
M	3	D	95.9	4.1	5
M	4	S	96.8	3.2	1
M	5	N	82.4	17.6	1
M	6	G	94.6	5.4	2
M	7	T	86.5	13.5	2
M	8	I	83.8	16.2	3
M	9	T	91	9	0
M	10	V	95	5	2
M	11	E	95.5	4.5	0
M	12	E	87.8	12.2	2
M	13	L	71.2	28.8	0
M	14	K	93.2	6.8	2
M	15	K	96.4	3.6	4
M	16	L	66.7	33.3	2
M	17	L	45	55	2
M	18	E	79.3	20.7	0
M	19	Q	32.4	67.6	2
M	20	W	12.2	87.8	0
M	21	N	17.6	82.4	0
M	22	L	30.2	69.8	0
M	23	V	65.3	34.7	2
M	24	I	59.9	40.1	1
M	25	G	27	73	1
M	26	F	79.7	20.3	1
M	27	L	88.3	11.7	0
M	28	F	30.6	69.4	0
M	29	L	25.7	74.3	1
M	30	T	86.9	13.1	0
M	31	W	66.2	33.8	1
M	32	I	28.8	71.2	0
M	33	C	91.4	8.6	2
M	34	L	41.9	58.1	1
M	35	L	16.7	83.3	0
M	36	Q	9.9	90.1	0
M	37	F	19.4	80.6	0
M	38	A	7.7	92.3	1
M	39	Y	31.1	68.9	0
M	40	A	41	59	2
M	41	N	53.6	46.4	1
M	42	R	21.2	78.8	0
M	43	N	54.1	45.9	1
M	44	R	73.4	26.6	0
M	45	F	93.7	6.3	0
M	46	L	62.6	37.4	1
M	47	Y	8.1	91.9	0
M	48	I	58.6	41.4	1
M	49	I	85.1	14.9	0
M	50	K	5	95	0
M	51	L	6.8	93.2	0
M	52	I	84.7	15.3	1
M	53	F	41.4	58.6	2
M	54	L	8.6	91.4	0
M	55	W	3.2	96.8	0
M	56	L	32.9	67.1	0
M	57	L	10.4	89.6	1
M	58	W	4.5	95.5	0
M	59	P	2.7	97.3	1
M	60	V	77.5	22.5	1
M	61	T	14.9	85.1	0
M	62	L	23.4	76.6	0
M	63	A	27.9	72.1	3
M	64	C	17.1	82.9	2
M	65	F	37.4	62.6	0
M	66	V	49.5	50.5	1
M	67	L	15.8	84.2	1
M	68	A	52.3	47.7	1
M	69	A	22.1	77.9	2
M	70	V	67.6	32.4	4
M	71	Y	69.4	30.6	0
M	72	R	68.5	31.5	0
M	73	I	50	50	0
M	74	N	75.2	24.8	1
M	75	W	82.9	17.1	1
M	76	I	77	23	1
M	77	T	50.5	49.5	2
M	78	G	27.5	72.5	3
M	79	G	48.6	51.4	1
M	80	I	45.9	54.1	1
M	81	A	20.7	79.3	1
M	82	I	33.8	66.2	0
M	83	A	60.4	39.6	2
M	84	M	39.2	60.8	2
M	85	A	43.2	56.8	2
M	86	C	69.8	30.2	1
M	87	L	74.3	25.7	1
M	88	V	50.9	49.1	1
M	89	G	74.8	25.2	1
M	90	L	91.9	8.1	2
M	91	M	49.1	50.9	2
M	92	W	6.3	93.7	0
M	93	L	88.7	11.3	0
M	94	S	65.8	34.2	2
M	95	Y	1.8	98.2	0
M	96	F	16.2	83.8	0
M	97	I	70.3	29.7	2
M	98	A	19.8	80.2	2
M	99	S	1.8	98.2	0
M	100	F	55.9	44.1	1
M	101	R	10.8	89.2	0
M	102	L	1.8	98.2	0
M	103	F	34.2	65.8	0
M	104	A	56.3	43.7	1
M	105	R	2.3	97.7	0
M	106	T	13.1	86.9	0
M	107	R	67.1	32.9	3
M	108	S	11.3	88.7	0
M	109	M	57.2	42.8	2
M	110	W	5.9	94.1	0
M	111	S	36	64	0
M	112	F	20.3	79.7	0
M	113	N	13.5	86.5	0
M	114	P	4.1	95.9	0
M	115	E	9	91	0
M	116	T	24.3	75.7	0
M	117	N	25.2	74.8	1
M	118	I	32	68	0
M	119	L	24.8	75.2	0
M	120	L	29.7	70.3	0
M	121	N	31.5	68.5	0
M	122	V	61.3	38.7	0
M	123	P	61.7	38.3	1
M	124	L	56.8	43.2	1
M	125	H	75.7	24.3	3
M	126	G	3.6	96.4	2
M	127	T	73	27	2
M	128	I	72.1	27.9	1
M	129	L	55	45	2
M	130	T	51.4	48.6	0
M	131	R	37.8	62.2	1
M	132	P	9.5	90.5	1
M	133	L	60.8	39.2	0
M	134	L	72.5	27.5	0
M	135	E	51.8	48.2	0
M	136	S	46.8	53.2	2
M	137	E	23.9	76.1	0
M	138	L	26.1	73.9	1
M	139	V	21.6	78.4	0
M	140	I	36.9	63.1	0
M	141	G	43.7	56.3	0
M	142	A	23	77	1
M	143	V	14.4	85.6	0
M	144	I	59	41	1
M	145	L	55.4	44.6	1
M	146	R	35.1	64.9	1
M	147	G	5.4	94.6	0
M	148	H	86	14	1
M	149	L	11.7	88.3	1
M	150	R	36.5	63.5	0
M	151	I	64	36	1
M	152	A	26.6	73.4	1
M	153	G	1.8	98.2	0
M	154	H	40.1	59.9	1
M	155	H	71.6	28.4	3
M	156	L	39.6	60.4	0
M	157	G	18.9	81.1	0
M	158	R	80.2	19.8	3
M	159	C	64.9	35.1	0
M	160	D	73.9	26.1	1
M	161	I	68.9	31.1	1
M	162	K	90.1	9.9	2
M	163	D	76.1	23.9	0
M	164	L	18.5	81.5	1
M	165	P	7.2	92.8	1
M	166	K	87.4	12.6	1
M	167	E	63.1	36.9	1
M	168	I	59.5	40.5	1
M	169	T	57.7	42.3	0
M	170	V	18	82	0
M	171	A	14	86	0
M	172	T	38.7	61.3	0
M	173	S	28.4	71.6	1
M	174	R	83.3	16.7	0
M	175	T	38.3	61.7	1
M	176	L	12.6	87.4	1
M	177	S	42.8	57.2	1
M	178	Y	47.3	52.7	0
M	179	Y	15.3	84.7	0
M	180	K	64.4	35.6	0
M	181	L	42.3	57.7	0
M	182	G	48.2	51.8	0
M	183	A	35.6	64.4	0
M	184	S	58.1	41.9	0
M	185	Q	45.5	54.5	2
M	186	R	78.8	21.2	0
M	187	V	77.9	22.1	0
M	188	A	81.5	18.5	2
M	189	G	92.3	7.7	2
M	190	D	89.2	10.8	1
M	191	S	53.2	46.8	1
M	192	G	46.4	53.6	0
M	193	F	44.6	55.4	0
M	194	A	68	32	1
M	195	A	52.7	47.3	0
M	196	Y	40.5	59.5	0
M	197	S	54.5	45.5	1
M	198	R	47.7	52.3	0
M	199	Y	70.7	29.3	1
M	200	R	33.3	66.7	1
M	201	I	63.5	36.5	0
M	202	G	23	77	0
M	203	N	29.3	70.7	0
M	204	Y	34.7	65.3	2
M	205	K	44.1	55.9	1
M	206	L	62.2	37.8	1
M	207	N	81.1	18.9	1
M	208	T	76.6	23.4	1
M	209	D	84.2	15.8	2
M	210	H	80.6	19.4	1
M	211	S	89.6	10.4	0
M	212	S	90.5	9.5	1
M	213	S	78.4	21.6	0
M	214	S	85.6	14.4	2
M	215	D	82	18	1
M	216	N	92.8	7.2	0
M	217	I	94.1	5.9	0
M	218	A	100	0	0
M	219	L	100	0	0
M	220	L	100	0	0
M	221	V	100	0	0
M	222	Q	100	0	1
N	1	M	100	0	0
N	2	S	100	0	1
N	3	D	100	0	3
N	4	N	100	0	1
N	5	G	100	0	3
N	6	P	100	0	3
N	7	Q	100	0	3
N	8	N	100	0	1
N	9	Q	100	0	1
N	10	R	100	0	2
N	11	N	100	0	4
N	12	A	100	0	4
N	13	P	100	0	4
N	14	R	100	0	4
N	15	I	100	0	0
N	16	T	100	0	1
N	17	F	100	0	0
N	18	G	100	0	4
N	19	G	100	0	3
N	20	P	100	0	3
N	21	S	100	0	2
N	22	D	100	0	4
N	23	S	100	0	3
N	24	T	100	0	2
N	25	G	100	0	4
N	26	S	100	0	4
N	27	N	100	0	1
N	28	Q	100	0	3
N	29	N	100	0	4
N	30	G	100	0	3
N	31	E	100	0	1
N	32	R	100	0	3
N	33	S	100	0	3
N	34	G	100	0	2
N	35	A	100	0	3
N	36	R	100	0	2
N	37	S	100	0	2
N	38	K	100	0	0
N	39	Q	100	0	1
N	40	R	100	0	3
N	41	R	100	0	2
N	42	P	100	0	0
N	43	Q	100	0	2
N	44	G	100	0	0
N	45	L	100	0	0
N	46	P	100	0	1
N	47	N	100	0	0
N	48	N	100	0	2
N	49	T	73.3	26.7	0
N	50	A	21.5	78.5	2
N	51	S	5.5	94.5	0
N	52	W	6.7	93.3	0
N	53	F	14.6	85.4	0
N	54	T	14.8	85.2	0
N	55	A	38.4	61.6	1
N	56	L	34.4	65.6	0
N	57	T	13.8	86.2	0
N	58	Q	15.5	84.5	0
N	59	H	22.9	77.1	0
N	60	G	16.2	83.8	2
N	61	K	18.6	81.4	1
N	62	E	70.4	29.6	2
N	63	D	63.2	36.8	3
N	64	L	55.6	44.4	0
N	65	K	69.9	30.1	2
N	66	F	45.8	54.2	0
N	67	P	54.4	45.6	3
N	68	R	68.5	31.5	0
N	69	G	21.7	78.3	0
N	70	Q	47	53	2
N	71	G	16.9	83.1	0
N	72	V	19.8	80.2	2
N	73	P	20.5	79.5	0
N	74	I	69.7	30.3	0
N	75	N	46.5	53.5	0
N	76	T	69.2	30.8	1
N	77	N	47.5	52.5	0
N	78	S	67.1	32.9	0
N	79	S	58.9	41.1	2
N	80	P	73.7	26.3	4
N	81	D	71.8	28.2	2
N	82	D	48.4	51.6	0
N	83	Q	36	64	1
N	84	I	11.7	88.3	1
N	85	G	1	99	0
N	86	Y	1.2	98.8	0
N	87	Y	4.1	95.9	0
N	88	R	22.4	77.6	1
N	89	R	14.3	85.7	2
N	90	A	12.4	87.6	3
N	91	T	71.1	28.9	0
N	92	R	25.3	74.7	0
N	93	R	66.3	33.7	1
N	94	I	35.6	64.4	0
N	95	R	16.7	83.3	1
N	96	G	35.3	64.7	1
N	97	G	39.1	60.9	1
N	98	D	12.6	87.4	1
N	99	G	4.3	95.7	1
N	100	K	48.7	51.3	1
N	101	M	30.3	69.7	2
N	102	K	60.9	39.1	0
N	103	D	67.8	32.2	2
N	104	L	10	90	0
N	105	S	24.1	75.9	0
N	106	P	19.3	80.7	0
N	107	R	11.9	88.1	0
N	108	W	7.2	92.8	0
N	109	Y	9.3	90.7	0
N	110	F	4.8	95.2	0
N	111	Y	3.3	96.7	0
N	112	Y	6.9	93.1	0
N	113	L	8.8	91.2	2
N	114	G	2.1	97.9	0
N	115	T	3.6	96.4	0
N	116	G	1	99	1
N	117	P	4.5	95.5	1
N	118	E	39.9	60.1	1
N	119	A	37.7	62.3	3
N	120	G	64	36	3
N	121	L	44.6	55.4	0
N	122	P	60.1	39.9	3
N	123	Y	23.6	76.4	0
N	124	G	6	94	1
N	125	A	62.5	37.5	2
N	126	N	67.3	32.7	0
N	127	K	46.8	53.2	1
N	128	D	51.8	48.2	3
N	129	G	8.6	91.4	1
N	130	I	14.1	85.9	0
N	131	I	61.6	38.4	1
N	132	W	1	99	1
N	133	V	1	99	0
N	134	A	16.7	83.3	1
N	135	T	70.2	29.8	2
N	136	E	69.5	30.5	1
N	137	G	9.5	90.5	0
N	138	A	12.9	87.1	1
N	139	L	25.5	74.5	2
N	140	N	55.1	44.9	2
N	141	T	61.3	38.7	1
N	142	P	39.4	60.6	1
N	143	K	49.9	50.1	0
N	144	D	49.6	50.4	5
N	145	H	31.5	68.5	3
N	146	I	19.6	80.4	1
N	147	G	21	79	1
N	148	T	37	63	3
N	149	R	2.9	97.1	1
N	150	N	19.1	80.9	0
N	151	P	29.1	70.9	3
N	152	A	40.6	59.4	2
N	153	N	23.4	76.6	0
N	154	N	52.3	47.7	1
N	155	A	64.9	35.1	1
N	156	A	56.8	43.2	1
N	157	I	52.7	47.3	2
N	158	V	33.9	66.1	0
N	159	L	36.8	63.2	0
N	160	Q	42.5	57.5	3
N	161	L	9.1	90.9	2
N	162	P	54.2	45.8	2
N	163	Q	60.4	39.6	3
N	164	G	26	74	1
N	165	T	28.4	71.6	0
N	166	T	43.9	56.1	1
N	167	L	28.6	71.4	1
N	168	P	11.5	88.5	3
N	169	K	46.1	53.9	1
N	170	G	27.4	72.6	1
N	171	F	40.8	59.2	0
N	172	Y	28.9	71.1	0
N	173	A	27.9	72.1	2
N	174	E	17.4	82.6	0
N	175	G	13.6	86.4	0
N	176	S	36	64	1
N	177	R	24.6	75.4	1
N	178	G	36.3	63.7	1
N	179	G	36.5	63.5	4
N	180	S	59.7	40.3	6
N	181	Q	52	48	1
N	182	A	50.4	49.6	3
N	183	S	47.7	52.3	3
N	184	S	44.2	55.8	3
N	185	R	34.6	65.4	4
N	186	S	27	73	3
N	187	S	69	31	1
N	188	S	20.8	79.2	2
N	189	R	51.6	48.4	1
N	190	S	32.2	67.8	3
N	191	R	30.1	69.9	4
N	192	N	68.3	31.7	3
N	193	S	50.8	49.2	4
N	194	S	23.2	76.8	2
N	195	R	43.2	56.8	4
N	196	N	58.2	41.8	3
N	197	S	62.8	37.2	3
N	198	T	30.8	69.2	1
N	199	P	45.1	54.9	3
N	200	G	52.5	47.5	1
N	201	S	74.9	25.1	3
N	202	S	41.8	58.2	4
N	203	R	22.7	77.3	5
N	204	G	68	32	4
N	205	T	72.1	27.9	1
N	206	S	31	69	3
N	207	P	51.3	48.7	2
N	208	A	66.1	33.9	3
N	209	R	45.3	54.7	4
N	210	M	71.6	28.4	4
N	211	A	73	27	3
N	212	G	76.8	23.2	2
N	213	N	74.7	25.3	3
N	214	G	100	0	3
N	215	G	100	0	4
N	216	D	65.4	34.6	4
N	217	A	64.2	35.8	2
N	218	A	57.8	42.2	3
N	219	L	50.6	49.4	1
N	220	A	48.2	51.8	2
N	221	L	53.2	46.8	0
N	222	L	25.1	74.9	0
N	223	L	24.8	75.2	0
N	224	L	31.3	68.7	1
N	225	D	43.7	56.3	1
N	226	R	13.4	86.6	0
N	227	L	26.5	73.5	1
N	228	N	54.9	45.1	2
N	229	Q	41.1	58.9	2
N	230	L	10.5	89.5	1
N	231	E	40.3	59.7	0
N	232	S	64.4	35.6	3
N	233	K	38.7	61.3	0
N	234	M	41.3	58.7	3
N	235	S	59.9	40.1	2
N	236	G	43.4	56.6	3
N	237	K	65.9	34.1	1
N	238	G	68.7	31.3	3
N	239	Q	66.6	33.4	2
N	240	Q	48	52	1
N	241	Q	54.7	45.3	1
N	242	Q	60.6	39.4	1
N	243	G	18.9	81.1	3
N	244	Q	57.5	42.5	2
N	245	T	55.8	44.2	2
N	246	V	47.3	52.7	3
N	247	T	44.4	55.6	3
N	248	K	38.2	61.8	2
N	249	K	58	42	1
N	250	S	67.5	32.5	2
N	251	A	38.9	61.1	2
N	252	A	58.5	41.5	3
N	253	E	53.9	46.1	1
N	254	A	51.1	48.9	2
N	255	S	49.2	50.8	2
N	256	K	46.3	53.7	1
N	257	K	10.3	89.7	0
N	258	P	21.2	78.8	0
N	259	R	33.2	66.8	0
N	260	Q	6.2	93.8	2
N	261	K	3.8	96.2	0
N	262	R	7.9	92.1	0
N	263	T	32.5	67.5	2
N	264	A	24.3	75.7	0
N	265	T	40.1	59.9	1
N	266	K	27.7	72.3	0
N	267	A	62.3	37.7	0
N	268	Y	35.3	64.7	0
N	269	N	65.6	34.4	1
N	270	V	17.9	82.1	1
N	271	T	42.2	57.8	2
N	272	Q	63.7	36.3	3
N	273	A	11.2	88.8	1
N	274	F	10.7	89.3	0
N	275	G	1.4	98.6	0
N	276	R	56.1	43.9	2
N	277	R	2.6	97.4	0
N	278	G	13.1	86.9	0
N	279	P	48.9	51.1	2
N	280	E	56.3	43.7	1
N	281	Q	100	0	3
N	282	T	22.2	77.8	1
N	283	Q	29.4	70.6	2
N	284	G	37.9	62.1	0
N	285	N	2.4	97.6	0
N	286	F	5.7	94.3	0
N	287	G	3.1	96.9	0
N	288	D	28.2	71.8	0
N	289	Q	70.6	29.4	3
N	290	E	63	37	1
N	291	L	43	57	0
N	292	I	42	58	3
N	293	R	34.1	65.9	0
N	294	Q	57	43	3
N	295	G	1.9	98.1	0
N	296	T	31.7	68.3	1
N	297	D	50.1	49.9	1
N	298	Y	8.1	91.9	0
N	299	K	37.2	62.8	0
N	300	H	32.9	67.1	2
N	301	W	17.7	82.3	0
N	302	P	9.8	90.2	1
N	303	Q	12.2	87.8	0
N	304	I	44.9	55.1	1
N	305	A	5.3	94.7	0
N	306	Q	17.2	82.8	0
N	307	F	18.1	81.9	0
N	308	A	42.7	57.3	1
N	309	P	1.7	98.3	1
N	310	S	33.7	66.3	3
N	311	A	59.4	40.6	1
N	312	S	20.3	79.7	0
N	313	A	6.4	93.6	1
N	314	F	41.5	58.5	0
N	315	F	37.5	62.5	0
N	316	G	7.6	92.4	0
N	317	M	11	89	3
N	318	S	5	95	0
N	319	R	56.6	43.4	1
N	320	I	34.8	65.2	1
N	321	G	59.2	40.8	2
N	322	M	55.4	44.6	2
N	323	E	57.3	42.7	1
N	324	V	27.2	72.8	3
N	325	T	75.9	24.1	3
N	326	P	75.4	24.6	2
N	327	S	76.4	23.6	1
N	328	G	73.5	26.5	1
N	329	T	75.7	24.3	1
N	330	W	30.5	69.5	1
N	331	L	15	85	1
N	332	T	66.8	33.2	1
N	333	Y	18.4	81.6	1
N	334	T	64.7	35.3	2
N	335	G	7.4	92.6	0
N	336	A	26.3	73.7	2
N	337	I	15.3	84.7	2
N	338	K	33.7	66.3	0
N	339	L	8.4	91.6	0
N	340	D	20.3	79.7	3
N	341	D	32.2	67.8	0
N	342	K	53.5	46.5	1
N	343	D	26.7	73.3	3
N	344	P	16	84	2
N	345	N	29.8	70.2	2
N	346	F	22	78	0
N	347	K	70.9	29.1	2
N	348	D	45.6	54.4	4
N	349	Q	29.6	70.4	0
N	350	V	49.4	50.6	1
N	351	I	61.8	38.2	1
N	352	L	23.9	76.1	0
N	353	L	15.8	84.2	0
N	354	N	63.7	36.3	1
N	355	K	58.7	41.3	0
N	356	H	25.8	74.2	0
N	357	I	39.6	60.4	1
N	358	D	53	47	0
N	359	A	32.7	67.3	2
N	360	Y	53.7	46.3	0
N	361	K	61.1	38.9	1
N	362	T	71.4	28.6	2
N	363	F	65.2	34.8	3
N	364	P	62.1	37.9	4
N	365	P	75.2	24.8	3
N	366	T	72.6	27.4	3
N	367	E	72.3	27.7	2
N	368	P	76.6	23.4	2
N	369	K	72.8	27.2	0
N	370	K	76.1	23.9	4
N	371	D	74.5	25.5	3
N	372	K	74	26	0
N	373	K	74.2	25.8	2
N	374	K	77.1	22.9	1
N	375	K	100	0	2
N	376	A	100	0	1
N	377	D	100	0	3
N	378	E	100	0	5
N	379	T	100	0	2
N	380	Q	100	0	3
N	381	A	100	0	3
N	382	L	100	0	1
N	383	P	100	0	2
N	384	Q	100	0	2
N	385	R	100	0	5
N	386	Q	100	0	4
N	387	K	100	0	2
N	388	K	100	0	2
N	389	Q	100	0	2
N	390	Q	100	0	4
N	391	T	100	0	1
N	392	V	100	0	1
N	393	T	100	0	1
N	394	L	100	0	0
N	395	L	100	0	0
N	396	P	100	0	2
N	397	A	100	0	3
N	398	A	100	0	2
N	399	D	100	0	5
N	400	L	100	0	0
N	401	D	100	0	1
N	402	D	100	0	2
N	403	F	100	0	0
N	404	S	100	0	0
N	405	K	100	0	0
N	406	Q	100	0	1
N	407	L	100	0	1
N	408	Q	100	0	1
N	409	Q	100	0	4
N	410	S	100	0	1
N	411	M	100	0	0
N	412	S	100	0	5
N	413	S	100	0	2
N	414	A	100	0	2
N	415	D	100	0	2
N	416	S	100	0	1
N	417	T	100	0	2
N	418	Q	100	0	3
N	419	A	100	0	2
ORF3a	1	M	49.5	50.5	2
ORF3a	2	D	49.5	50.5	3
ORF3a	3	L	49.5	50.5	1
ORF3a	4	F	49.5	50.5	1
ORF3a	5	M	64	36	2
ORF3a	6	R	86.9	13.1	4
ORF3a	7	I	70.5	29.5	2
ORF3a	8	F	40.4	59.6	1
ORF3a	9	T	40.4	59.6	2
ORF3a	10	I	65.5	34.5	0
ORF3a	11	G	50.2	49.8	2
ORF3a	12	T	82.5	17.5	2
ORF3a	13	V	57.1	42.9	3
ORF3a	14	T	64.7	35.3	1
ORF3a	15	L	81.1	18.9	2
ORF3a	16	K	93.8	6.2	3
ORF3a	17	Q	97.1	2.9	3
ORF3a	18	G	98.9	1.1	5
ORF3a	19	E	78.2	21.8	3
ORF3a	20	I	48	52	1
ORF3a	21	K	92.7	7.3	3
ORF3a	22	D	68.7	31.3	3
ORF3a	23	A	58.9	41.1	2
ORF3a	24	T	95.6	4.4	2
ORF3a	25	P	88.4	11.6	3
ORF3a	26	S	68.7	31.3	3
ORF3a	27	D	80.4	19.6	4
ORF3a	28	F	75.3	24.7	0
ORF3a	29	V	82.2	17.8	1
ORF3a	30	R	72.7	27.3	3
ORF3a	31	A	90.9	9.1	2
ORF3a	32	T	40.4	59.6	1
ORF3a	33	A	40.4	59.6	2
ORF3a	34	T	58.9	41.1	2
ORF3a	35	I	40.4	59.6	2
ORF3a	36	P	40.4	59.6	2
ORF3a	37	I	57.1	42.9	4
ORF3a	38	Q	40.4	59.6	5
ORF3a	39	A	40.4	59.6	2
ORF3a	40	S	89.8	10.2	2
ORF3a	41	L	80.7	19.3	4
ORF3a	42	P	69.8	30.2	3
ORF3a	43	F	40.4	59.6	4
ORF3a	44	G	69.8	30.2	3
ORF3a	45	W	40.4	59.6	2
ORF3a	46	L	40.4	59.6	2
ORF3a	47	I	90.2	9.8	2
ORF3a	48	V	92.4	7.6	4
ORF3a	49	G	40.4	59.6	5
ORF3a	50	V	40.4	59.6	2
ORF3a	51	A	40.4	59.6	1
ORF3a	52	L	93.5	6.5	2
ORF3a	53	L	40.4	59.6	2
ORF3a	54	A	41.5	58.5	3
ORF3a	55	V	40.4	59.6	3
ORF3a	56	F	40.4	59.6	2
ORF3a	57	Q	40.4	59.6	4
ORF3a	58	S	52.7	47.3	3
ORF3a	59	A	42.9	57.1	4
ORF3a	60	S	83.6	16.4	1
ORF3a	61	K	40.4	59.6	1
ORF3a	62	I	86.9	13.1	4
ORF3a	63	I	40.4	59.6	1
ORF3a	64	T	73.1	26.9	1
ORF3a	65	L	48	52	2
ORF3a	66	K	84.4	15.6	2
ORF3a	67	K	96.7	3.3	2
ORF3a	68	R	69.1	30.9	2
ORF3a	69	W	40.4	59.6	4
ORF3a	70	Q	40.4	59.6	0
ORF3a	71	L	48	52	0
ORF3a	72	A	48	52	2
ORF3a	73	L	49.8	50.2	1
ORF3a	74	S	80	20	2
ORF3a	75	K	48	52	3
ORF3a	76	G	48	52	1
ORF3a	77	V	97.8	2.2	2
ORF3a	78	H	57.1	42.9	4
ORF3a	79	F	89.1	10.9	0
ORF3a	80	V	83.6	16.4	4
ORF3a	81	C	62.5	37.5	3
ORF3a	82	N	52.7	47.3	2
ORF3a	83	L	77.5	22.5	2
ORF3a	84	L	40.4	59.6	0
ORF3a	85	L	52.7	47.3	2
ORF3a	86	L	64	36	2
ORF3a	87	F	58.9	41.1	2
ORF3a	88	V	67.6	32.4	3
ORF3a	89	T	40.4	59.6	2
ORF3a	90	V	61.8	38.2	3
ORF3a	91	Y	40.4	59.6	1
ORF3a	92	S	52.7	47.3	1
ORF3a	93	H	40.4	59.6	1
ORF3a	94	L	66.9	33.1	2
ORF3a	95	L	40.4	59.6	1
ORF3a	96	L	40.4	59.6	2
ORF3a	97	V	93.1	6.9	4
ORF3a	98	A	40.4	59.6	1
ORF3a	99	A	60.7	39.3	4
ORF3a	100	G	57.5	42.5	4
ORF3a	101	L	76.4	23.6	1
ORF3a	102	E	40.4	59.6	0
ORF3a	103	A	91.6	8.4	2
ORF3a	104	P	73.8	26.2	3
ORF3a	105	F	40.4	59.6	2
ORF3a	106	L	42.5	57.5	1
ORF3a	107	Y	60.7	39.3	2
ORF3a	108	L	79.3	20.7	4
ORF3a	109	Y	48	52	1
ORF3a	110	A	40.4	59.6	4
ORF3a	111	L	66.2	33.8	1
ORF3a	112	V	71.3	28.7	3
ORF3a	113	Y	40.4	59.6	1
ORF3a	114	F	89.8	10.2	3
ORF3a	115	L	40.4	59.6	0
ORF3a	116	Q	40.4	59.6	1
ORF3a	117	S	100	0	2
ORF3a	118	I	98.2	1.8	2
ORF3a	119	N	91.3	8.7	2
ORF3a	120	F	68	32	0
ORF3a	121	V	84	16	1
ORF3a	122	R	40.4	59.6	2
ORF3a	123	I	96	4	1
ORF3a	124	I	84.7	15.3	0
ORF3a	125	M	64	36	3
ORF3a	126	R	40.4	59.6	3
ORF3a	127	L	71.3	28.7	2
ORF3a	128	W	40.4	59.6	2
ORF3a	129	L	40.4	59.6	1
ORF3a	130	C	40.4	59.6	1
ORF3a	131	W	40.4	59.6	4
ORF3a	132	K	40.4	59.6	0
ORF3a	133	C	40.4	59.6	1
ORF3a	134	R	73.5	26.5	3
ORF3a	135	S	40.4	59.6	0
ORF3a	136	K	66.2	33.8	2
ORF3a	137	N	40.4	59.6	2
ORF3a	138	P	40.4	59.6	0
ORF3a	139	L	64.7	35.3	0
ORF3a	140	L	48	52	3
ORF3a	141	Y	40.4	59.6	0
ORF3a	142	D	62.5	37.5	1
ORF3a	143	A	67.3	32.7	3
ORF3a	144	N	52.7	47.3	2
ORF3a	145	Y	40.4	59.6	1
ORF3a	146	F	40.4	59.6	1
ORF3a	147	L	57.1	42.9	1
ORF3a	148	C	40.4	59.6	1
ORF3a	149	W	40.4	59.6	2
ORF3a	150	H	40.4	59.6	2
ORF3a	151	T	40.4	59.6	2
ORF3a	152	N	94.5	5.5	2
ORF3a	153	C	76	24	1
ORF3a	154	Y	81.8	18.2	3
ORF3a	155	D	40.4	59.6	2
ORF3a	156	Y	40.4	59.6	3
ORF3a	157	C	40.4	59.6	0
ORF3a	158	I	40.4	59.6	3
ORF3a	159	P	40.4	59.6	1
ORF3a	160	Y	40.4	59.6	1
ORF3a	161	N	40.4	59.6	1
ORF3a	162	S	41.5	58.5	0
ORF3a	163	V	76.7	23.3	1
ORF3a	164	T	40.4	59.6	0
ORF3a	165	S	88	12	3
ORF3a	166	S	57.1	42.9	1
ORF3a	167	I	70.2	29.8	1
ORF3a	168	V	40.4	59.6	2
ORF3a	169	I	94.9	5.1	0
ORF3a	170	T	40.4	59.6	0
ORF3a	171	S	99.6	0.4	2
ORF3a	172	G	40.7	59.3	4
ORF3a	173	D	40.4	59.6	2
ORF3a	174	G	40.4	59.6	3
ORF3a	175	T	90.5	9.5	3
ORF3a	176	T	92	8	1
ORF3a	177	S	99.3	0.7	2
ORF3a	178	P	40.4	59.6	2
ORF3a	179	I	86.2	13.8	1
ORF3a	180	S	85.8	14.2	1
ORF3a	181	E	88	12	0
ORF3a	182	H	77.8	22.2	2
ORF3a	183	D	59.6	40.4	1
ORF3a	184	Y	40.4	59.6	1
ORF3a	185	Q	40.4	59.6	3
ORF3a	186	I	40.4	59.6	1
ORF3a	187	G	40.4	59.6	2
ORF3a	188	G	40.4	59.6	2
ORF3a	189	Y	52.7	47.3	2
ORF3a	190	T	74.9	25.1	2
ORF3a	191	E	40.4	59.6	4
ORF3a	192	K	94.2	5.8	1
ORF3a	193	W	72.4	27.6	3
ORF3a	194	E	61.8	38.2	1
ORF3a	195	S	40.4	59.6	2
ORF3a	196	G	40.4	59.6	2
ORF3a	197	V	42.2	57.8	2
ORF3a	198	K	40.4	59.6	2
ORF3a	199	D	40.4	59.6	1
ORF3a	200	C	57.1	42.9	1
ORF3a	201	V	58.9	41.1	1
ORF3a	202	V	61.1	38.9	1
ORF3a	203	L	85.5	14.5	0
ORF3a	204	H	71.6	28.4	2
ORF3a	205	S	57.1	42.9	1
ORF3a	206	Y	64	36	1
ORF3a	207	F	50.5	49.5	1
ORF3a	208	T	59.6	40.4	1
ORF3a	209	S	57.1	42.9	0
ORF3a	210	D	96.4	3.6	2
ORF3a	211	Y	79.6	20.4	2
ORF3a	212	Y	40.4	59.6	0
ORF3a	213	Q	40.4	59.6	2
ORF3a	214	L	40.4	59.6	0
ORF3a	215	Y	57.1	42.9	1
ORF3a	216	S	42.2	57.8	1
ORF3a	217	T	40.4	59.6	2
ORF3a	218	Q	40.4	59.6	1
ORF3a	219	L	85.1	14.9	4
ORF3a	220	S	81.5	18.5	1
ORF3a	221	T	65.1	34.9	0
ORF3a	222	D	53.1	46.9	4
ORF3a	223	T	40.4	59.6	2
ORF3a	224	G	40.4	59.6	3
ORF3a	225	V	88.7	11.3	4
ORF3a	226	E	75.6	24.4	0
ORF3a	227	H	57.1	42.9	1
ORF3a	228	V	57.1	42.9	0
ORF3a	229	T	40.4	59.6	1
ORF3a	230	F	40.4	59.6	1
ORF3a	231	F	40.4	59.6	2
ORF3a	232	I	48	52	0
ORF3a	233	Y	77.1	22.9	1
ORF3a	234	N	72	28	1
ORF3a	235	K	40.4	59.6	2
ORF3a	236	I	74.9	25.1	1
ORF3a	237	V	48	52	2
ORF3a	238	D	74.9	25.1	3
ORF3a	239	E	78.5	21.5	3
ORF3a	240	P	78.9	21.1	3
ORF3a	241	E	97.5	2.5	2
ORF3a	242	E	98.5	1.5	2
ORF3a	243	H	83.6	16.4	0
ORF3a	244	V	40.4	59.6	0
ORF3a	245	Q	40.4	59.6	1
ORF3a	246	I	48	52	1
ORF3a	247	H	40.4	59.6	1
ORF3a	248	T	40.4	59.6	0
ORF3a	249	I	40.4	59.6	0
ORF3a	250	D	40.4	59.6	1
ORF3a	251	G	40.4	59.6	4
ORF3a	252	S	60.7	39.3	1
ORF3a	253	S	40.4	59.6	3
ORF3a	254	G	40.4	59.6	3
ORF3a	255	V	40.4	59.6	1
ORF3a	256	V	87.3	12.7	3
ORF3a	257	N	40.4	59.6	2
ORF3a	258	P	48	52	2
ORF3a	259	V	95.3	4.7	2
ORF3a	260	M	48	52	4
ORF3a	261	E	66.5	33.5	0
ORF3a	262	P	40.4	59.6	2
ORF3a	263	I	40.4	59.6	2
ORF3a	264	Y	40.4	59.6	2
ORF3a	265	D	40.4	59.6	0
ORF3a	266	E	40.4	59.6	0
ORF3a	267	P	40.4	59.6	3
ORF3a	268	T	40.4	59.6	2
ORF3a	269	T	48	52	3
ORF3a	270	T	40.4	59.6	1
ORF3a	271	T	40.4	59.6	2
ORF3a	272	S	40.4	59.6	1
ORF3a	273	V	40.4	59.6	2
ORF3a	274	P	40.4	59.6	0
ORF3a	275	L	40.4	59.6	1
ORF6	1	M	18	82	1
ORF6	2	F	18	82	1
ORF6	3	H	29.5	70.5	1
ORF6	4	L	44.3	55.7	2
ORF6	5	V	18	82	3
ORF6	6	D	57.4	42.6	2
ORF6	7	F	18	82	2
ORF6	8	Q	18	82	2
ORF6	9	V	18	82	1
ORF6	10	T	18	82	1
ORF6	11	I	49.2	50.8	3
ORF6	12	A	18	82	1
ORF6	13	E	18	82	3
ORF6	14	I	63.9	36.1	2
ORF6	15	L	45.9	54.1	0
ORF6	16	L	70.5	29.5	1
ORF6	17	I	34.4	65.6	0
ORF6	18	I	18	82	2
ORF6	19	M	18	82	1
ORF6	20	R	50.8	49.2	3
ORF6	21	T	29.5	70.5	2
ORF6	22	F	34.4	65.6	1
ORF6	23	K	88.5	11.5	1
ORF6	24	V	73.8	26.2	3
ORF6	25	S	77	23	1
ORF6	26	I	29.5	70.5	0
ORF6	27	W	80.3	19.7	3
ORF6	28	N	67.2	32.8	0
ORF6	29	L	36.1	63.9	0
ORF6	30	D	29.5	70.5	1
ORF6	31	Y	98.4	1.6	1
ORF6	32	I	100	0	1
ORF6	33	I	65.6	34.4	1
ORF6	34	N	68.9	31.1	1
ORF6	35	L	62.3	37.7	2
ORF6	36	I	29.5	70.5	2
ORF6	37	I	55.7	44.3	1
ORF6	38	K	82	18	1
ORF6	39	N	55.7	44.3	3
ORF6	40	L	59	41	1
ORF6	41	S	90.2	9.8	2
ORF6	42	K	34.4	65.6	1
ORF6	43	S	72.1	27.9	0
ORF6	44	L	19.7	80.3	0
ORF6	45	T	29.5	70.5	1
ORF6	46	E	55.7	44.3	1
ORF6	47	N	88.5	11.5	1
ORF6	48	K	95.1	4.9	2
ORF6	49	Y	47.5	52.5	0
ORF6	50	S	75.4	24.6	1
ORF6	51	Q	96.7	3.3	0
ORF6	52	L	44.3	55.7	1
ORF6	53	D	44.3	55.7	2
ORF6	54	E	83.6	16.4	1
ORF6	55	E	44.3	55.7	2
ORF6	56	Q	91.8	8.2	0
ORF6	57	P	78.7	21.3	1
ORF6	58	M	44.3	55.7	2
ORF6	59	E	60.7	39.3	1
ORF6	60	I	93.4	6.6	3
ORF6	61	D	85.2	14.8	4
ORF7a	1	M	24.8	75.2	1
ORF7a	2	K	24.8	75.2	2
ORF7a	3	I	58.7	41.3	2
ORF7a	4	I	54.5	45.5	3
ORF7a	5	L	71.9	28.1	3
ORF7a	6	F	77.7	22.3	0
ORF7a	7	L	83.5	16.5	1
ORF7a	8	A	95	5	4
ORF7a	9	L	76.9	23.1	1
ORF7a	10	I	85.1	14.9	3
ORF7a	11	T	100	0	3
ORF7a	12	L	90.9	9.1	3
ORF7a	13	A	92.6	7.4	3
ORF7a	14	T	98.3	1.7	2
ORF7a	15	C	96.7	3.3	1
ORF7a	16	E	32.2	67.8	3
ORF7a	17	L	56.2	43.8	1
ORF7a	18	Y	28.9	71.1	1
ORF7a	19	H	8.3	91.7	0
ORF7a	20	Y	5.8	94.2	1
ORF7a	21	Q	38	62	1
ORF7a	22	E	19	81	1
ORF7a	23	C	5.8	94.2	1
ORF7a	24	V	81	19	2
ORF7a	25	R	57.9	42.1	2
ORF7a	26	G	5.8	94.2	0
ORF7a	27	T	21.5	78.5	0
ORF7a	28	T	22.3	77.7	1
ORF7a	29	V	42.1	57.9	3
ORF7a	30	L	19	81	1
ORF7a	31	L	72.7	27.3	1
ORF7a	32	K	97.5	2.5	3
ORF7a	33	E	42.1	57.9	2
ORF7a	34	P	5.8	94.2	2
ORF7a	35	C	5.8	94.2	0
ORF7a	36	S	86.8	13.2	2
ORF7a	37	S	36.4	63.6	3
ORF7a	38	G	46.3	53.7	3
ORF7a	39	T	33.9	66.1	1
ORF7a	40	Y	42.1	57.9	1
ORF7a	41	E	5.8	94.2	2
ORF7a	42	G	19	81	1
ORF7a	43	N	19	81	4
ORF7a	44	S	31.4	68.6	1
ORF7a	45	P	5.8	94.2	3
ORF7a	46	F	51.2	48.8	1
ORF7a	47	H	19	81	4
ORF7a	48	P	19	81	2
ORF7a	49	L	28.9	71.1	3
ORF7a	50	A	28.9	71.1	3
ORF7a	51	D	33.9	66.1	2
ORF7a	52	N	57	43	2
ORF7a	53	K	44.6	55.4	0
ORF7a	54	F	19	81	3
ORF7a	55	A	19	81	1
ORF7a	56	L	66.1	33.9	2
ORF7a	57	T	78.5	21.5	3
ORF7a	58	C	19	81	0
ORF7a	59	F	99.2	0.8	0
ORF7a	60	S	82.6	17.4	4
ORF7a	61	T	23.1	76.9	0
ORF7a	62	Q	91.7	8.3	2
ORF7a	63	F	28.9	71.1	1
ORF7a	64	A	62	38	2
ORF7a	65	F	67.8	32.2	1
ORF7a	66	A	30.6	69.4	2
ORF7a	67	C	67.8	32.2	3
ORF7a	68	P	81.8	18.2	2
ORF7a	69	D	42.1	57.9	3
ORF7a	70	G	53.7	46.3	2
ORF7a	71	V	60.3	39.7	2
ORF7a	72	K	84.3	15.7	1
ORF7a	73	H	19	81	2
ORF7a	74	V	69.4	30.6	2
ORF7a	75	Y	89.3	10.7	2
ORF7a	76	Q	19	81	2
ORF7a	77	L	19	81	0
ORF7a	78	R	44.6	55.4	5
ORF7a	79	A	19	81	3
ORF7a	80	R	42.1	57.9	4
ORF7a	81	S	49.6	50.4	2
ORF7a	82	V	47.1	52.9	3
ORF7a	83	S	34.7	65.3	1
ORF7a	84	P	21.5	78.5	4
ORF7a	85	K	51.2	48.8	2
ORF7a	86	L	28.9	71.1	1
ORF7a	87	F	21.5	78.5	2
ORF7a	88	I	88.4	11.6	3
ORF7a	89	R	43	57	4
ORF7a	90	Q	62.8	37.2	1
ORF7a	91	E	53.7	46.3	2
ORF7a	92	E	93.4	6.6	1
ORF7a	93	V	61.2	38.8	3
ORF7a	94	Q	36.4	63.6	4
ORF7a	95	E	53.7	46.3	2
ORF7a	96	L	45.5	54.5	2
ORF7a	97	Y	64.5	35.5	1
ORF7a	98	S	48.8	51.2	3
ORF7a	99	P	37.2	62.8	2
ORF7a	100	I	87.6	12.4	2
ORF7a	101	F	79.3	20.7	1
ORF7a	102	L	8.3	91.7	4
ORF7a	103	I	8.3	91.7	0
ORF7a	104	V	63.6	36.4	2
ORF7a	105	A	94.2	5.8	2
ORF7a	106	A	70.2	29.8	2
ORF7a	107	I	60.3	39.7	0
ORF7a	108	V	48.8	51.2	1
ORF7a	109	F	55.4	44.6	1
ORF7a	110	I	90.1	9.9	1
ORF7a	111	T	65.3	34.7	0
ORF7a	112	L	71.1	28.9	2
ORF7a	113	C	74.4	25.6	1
ORF7a	114	F	74.4	25.6	2
ORF7a	115	T	86	14	2
ORF7a	116	L	95.9	4.1	3
ORF7a	117	K	68.6	31.4	1
ORF7a	118	R	75.2	24.8	2
ORF7a	119	K	76	24	3
ORF7a	120	T	80.2	19.8	2
ORF7a	121	E	30.6	69.4	1
ORF7b	1	M	55.8	44.2	3
ORF7b	2	I	90.7	9.3	2
ORF7b	3	E	76.7	23.3	4
ORF7b	4	L	81.4	18.6	1
ORF7b	5	S	83.7	16.3	1
ORF7b	6	L	55.8	44.2	0
ORF7b	7	I	76.7	23.3	1
ORF7b	8	D	55.8	44.2	2
ORF7b	9	F	55.8	44.2	0
ORF7b	10	Y	55.8	44.2	1
ORF7b	11	L	55.8	44.2	1
ORF7b	12	C	55.8	44.2	0
ORF7b	13	F	76.7	23.3	0
ORF7b	14	L	55.8	44.2	0
ORF7b	15	A	76.7	23.3	3
ORF7b	16	F	76.7	23.3	1
ORF7b	17	L	55.8	44.2	1
ORF7b	18	L	55.8	44.2	0
ORF7b	19	F	55.8	44.2	2
ORF7b	20	L	55.8	44.2	1
ORF7b	21	V	55.8	44.2	2
ORF7b	22	L	76.7	23.3	0
ORF7b	23	I	55.8	44.2	0
ORF7b	24	M	55.8	44.2	1
ORF7b	25	L	55.8	44.2	2
ORF7b	26	I	55.8	44.2	2
ORF7b	27	I	55.8	44.2	1
ORF7b	28	F	55.8	44.2	1
ORF7b	29	W	76.7	23.3	2
ORF7b	30	F	55.8	44.2	2
ORF7b	31	S	76.7	23.3	2
ORF7b	32	L	55.8	44.2	1
ORF7b	33	E	55.8	44.2	1
ORF7b	34	L	95.3	4.7	1
ORF7b	35	Q	79.1	20.9	0
ORF7b	36	D	55.8	44.2	2
ORF7b	37	H	97.7	2.3	3
ORF7b	38	N	86	14	1
ORF7b	39	E	55.8	44.2	1
ORF7b	40	T	88.4	11.6	1
ORF7b	41	C	76.7	23.3	2
ORF7b	42	H	100	0	2
ORF7b	43	A	93	7	4
ORF8	1	M	15.7	84.3	3
ORF8	2	K	15.7	84.3	1
ORF8	3	F	61.2	38.8	3
ORF8	4	L	15.7	84.3	1
ORF8	5	V	38	62	1
ORF8	6	F	42.1	57.9	0
ORF8	7	L	86.8	13.2	1
ORF8	8	G	35.5	64.5	3
ORF8	9	I	53.7	46.3	1
ORF8	10	I	61.2	38.8	3
ORF8	11	T	57	43	3
ORF8	12	T	89.3	10.7	2
ORF8	13	V	35.5	64.5	0
ORF8	14	A	90.1	9.9	2
ORF8	15	A	66.1	33.9	1
ORF8	16	F	91.7	8.3	2
ORF8	17	H	35.5	64.5	2
ORF8	18	Q	79.3	20.7	1
ORF8	19	E	35.5	64.5	1
ORF8	20	C	35.5	64.5	2
ORF8	21	S	46.3	53.7	3
ORF8	22	L	53.7	46.3	0
ORF8	23	Q	15.7	84.3	1
ORF8	24	S	71.9	28.1	1
ORF8	25	C	15.7	84.3	2
ORF8	26	T	95.9	4.1	3
ORF8	27	Q	64.5	35.5	1
ORF8	28	H	54.5	45.5	2
ORF8	29	Q	73.6	26.4	0
ORF8	30	P	18.2	81.8	4
ORF8	31	Y	90.9	9.1	1
ORF8	32	V	62	38	2
ORF8	33	V	92.6	7.4	3
ORF8	34	D	38	62	2
ORF8	35	D	56.2	43.8	3
ORF8	36	P	15.7	84.3	3
ORF8	37	C	21.5	78.5	2
ORF8	38	P	15.7	84.3	3
ORF8	39	I	35.5	64.5	2
ORF8	40	H	35.5	64.5	4
ORF8	41	F	38	62	1
ORF8	42	Y	57.9	42.1	0
ORF8	43	S	35.5	64.5	0
ORF8	44	K	69.4	30.6	0
ORF8	45	W	15.7	84.3	3
ORF8	46	Y	67.8	32.2	1
ORF8	47	I	68.6	31.4	1
ORF8	48	R	58.7	41.3	0
ORF8	49	V	53.7	46.3	0
ORF8	50	G	70.2	29.8	1
ORF8	51	A	93.4	6.6	4
ORF8	52	R	39.7	60.3	3
ORF8	53	K	55.4	44.6	1
ORF8	54	S	35.5	64.5	3
ORF8	55	A	35.5	64.5	2
ORF8	56	P	86	14	2
ORF8	57	L	47.9	52.1	0
ORF8	58	I	76.9	23.1	2
ORF8	59	E	86	14	1
ORF8	60	L	15.7	84.3	2
ORF8	61	C	15.7	84.3	1
ORF8	62	V	81.8	18.2	3
ORF8	63	D	53.7	46.3	3
ORF8	64	E	78.5	21.5	3
ORF8	65	A	81	19	3
ORF8	66	G	16.5	83.5	4
ORF8	67	S	96.7	3.3	1
ORF8	68	K	53.7	46.3	1
ORF8	69	S	98.3	1.7	2
ORF8	70	P	35.5	64.5	1
ORF8	71	I	46.3	53.7	2
ORF8	72	Q	100	0	3
ORF8	73	Y	35.5	64.5	1
ORF8	74	I	82.6	17.4	1
ORF8	75	D	76.9	23.1	2
ORF8	76	I	76.9	23.1	1
ORF8	77	G	35.5	64.5	2
ORF8	78	N	35.5	64.5	0
ORF8	79	Y	35.5	64.5	1
ORF8	80	T	44.6	55.4	1
ORF8	81	V	71.1	28.9	3
ORF8	82	S	95	5	1
ORF8	83	C	15.7	84.3	1
ORF8	84	L	81	19	2
ORF8	85	P	15.7	84.3	2
ORF8	86	F	87.6	12.4	0
ORF8	87	T	41.3	58.7	1
ORF8	88	I	15.7	84.3	1
ORF8	89	N	39.7	60.3	2
ORF8	90	C	15.7	84.3	0
ORF8	91	Q	15.7	84.3	3
ORF8	92	E	94.2	5.8	1
ORF8	93	P	15.7	84.3	1
ORF8	94	K	86	14	2
ORF8	95	L	53.7	46.3	1
ORF8	96	G	15.7	84.3	3
ORF8	97	S	44.6	55.4	1
ORF8	98	L	15.7	84.3	1
ORF8	99	V	65.3	34.7	1
ORF8	100	V	35.5	64.5	1
ORF8	101	R	15.7	84.3	3
ORF8	102	C	21.5	78.5	1
ORF8	103	S	44.6	55.4	1
ORF8	104	F	63.6	36.4	2
ORF8	105	Y	86	14	0
ORF8	106	E	97.5	2.5	1
ORF8	107	D	88.4	11.6	3
ORF8	108	F	66.9	33.1	2
ORF8	109	L	99.2	0.8	0
ORF8	110	E	59.5	40.5	3
ORF8	111	Y	78.5	21.5	1
ORF8	112	H	35.5	64.5	2
ORF8	113	D	19.8	80.2	1
ORF8	114	V	74.4	25.6	2
ORF8	115	R	41.3	58.7	3
ORF8	116	V	17.4	82.6	1
ORF8	117	V	47.1	52.9	1
ORF8	118	L	19	81	1
ORF8	119	D	62.8	37.2	3
ORF8	120	F	48.8	51.2	2
ORF8	121	I	72.7	27.3	3
S	1	M	100	0	0
S	2	F	100	0	1
S	3	V	100	0	2
S	4	F	100	0	1
S	5	L	100	0	2
S	6	V	100	0	2
S	7	L	100	0	2
S	8	L	100	0	3
S	9	P	97.6	2.4	3
S	10	L	97.5	2.5	1
S	11	V	92.1	7.9	3
S	12	S	93.5	6.5	3
S	13	S	90.9	9.1	2
S	14	Q	97.5	2.5	1
S	15	C	85.8	14.2	1
S	16	V	92.5	7.5	1
S	17	N	95.1	4.9	2
S	18	L	91.4	8.6	2
S	19	T	91.1	8.9	2
S	20	T	94.8	5.2	3
S	21	R	91.7	8.3	3
S	22	T	82.7	17.3	3
S	23	Q	84.8	15.2	1
S	24	L	73.4	26.6	2
S	25	P	86.9	13.1	2
S	26	P	84.9	15.1	4
S	27	A	86.2	13.8	3
S	28	Y	75.7	24.3	2
S	29	T	85.4	14.6	2
S	30	N	77.9	22.1	1
S	31	S	46.5	53.5	0
S	32	F	67.6	32.4	2
S	33	T	85.6	14.4	3
S	34	R	45.8	54.2	1
S	35	G	38.5	61.5	1
S	36	V	51.2	48.8	0
S	37	Y	44.9	55.1	0
S	38	Y	44.2	55.8	1
S	39	P	66.7	33.3	0
S	40	D	45.5	54.5	0
S	41	K	69.4	30.6	1
S	42	V	57	43	1
S	43	F	55.4	44.6	0
S	44	R	45.9	54.1	0
S	45	S	38.7	61.3	1
S	46	S	63.3	36.7	2
S	47	V	76.4	23.6	2
S	48	L	64.7	35.3	0
S	49	H	73.1	26.9	1
S	50	S	51.7	48.3	1
S	51	T	69.5	30.5	1
S	52	Q	64.8	35.2	2
S	53	D	60.9	39.1	0
S	54	L	78.3	21.7	1
S	55	F	48.5	51.5	0
S	56	L	48.3	51.7	0
S	57	P	56.2	43.8	1
S	58	F	50.2	49.8	0
S	59	F	84.3	15.7	0
S	60	S	66.1	33.9	0
S	61	N	56.2	43.8	0
S	62	V	67.8	32.2	3
S	63	T	59.2	40.8	0
S	64	W	82.2	17.8	3
S	65	F	64.1	35.9	0
S	66	H	84.4	15.6	0
S	67	A	73.8	26.2	2
S	68	I	83.3	16.7	4
S	69	H	82	18	3
S	70	V	90.8	9.2	1
S	71	S	91	9	3
S	72	G	100	0	4
S	73	T	100	0	1
S	74	N	100	0	2
S	75	G	100	0	5
S	76	T	100	0	1
S	77	K	100	0	2
S	78	R	100	0	4
S	79	F	63.4	36.6	0
S	80	D	61.9	38.1	3
S	81	N	50.5	49.5	0
S	82	P	53.3	46.7	0
S	83	V	73	27	1
S	84	L	67.9	32.1	1
S	85	P	76.8	23.2	0
S	86	F	42.9	57.1	1
S	87	N	80.2	19.8	1
S	88	D	50.4	49.6	5
S	89	G	41.6	58.4	0
S	90	V	72.4	27.6	2
S	91	Y	44	56	0
S	92	F	46	54	0
S	93	A	56.5	43.5	1
S	94	S	63.9	36.1	1
S	95	T	56.6	43.4	3
S	96	E	52.9	47.1	3
S	97	K	70.1	29.9	4
S	98	S	53.1	46.9	2
S	99	N	45.1	54.9	0
S	100	I	71.9	28.1	1
S	101	I	70.8	29.2	2
S	102	R	44.6	55.4	3
S	103	G	45.2	54.8	0
S	104	W	42.1	57.9	0
S	105	I	71.3	28.7	2
S	106	F	47.1	52.9	0
S	107	G	47.8	52.2	1
S	108	T	58.5	41.5	0
S	109	T	61.4	38.6	1
S	110	L	78.6	21.4	0
S	111	D	67.8	32.2	1
S	112	S	54.8	45.2	2
S	113	K	70.7	29.3	1
S	114	T	61.1	38.9	0
S	115	Q	55.1	44.9	0
S	116	S	55.1	44.9	0
S	117	L	66.4	33.6	0
S	118	L	78	22	1
S	119	I	59.5	40.5	1
S	120	V	78.9	21.1	2
S	121	N	53.4	46.6	1
S	122	N	47	53	0
S	123	A	59.8	40.2	1
S	124	T	51	49	1
S	125	N	66.8	33.2	2
S	126	V	75.6	24.4	0
S	127	V	75.3	24.7	2
S	128	I	53.5	46.5	2
S	129	K	76	24	1
S	130	V	54.2	45.8	1
S	131	C	48.9	51.1	0
S	132	E	58.3	41.7	1
S	133	F	40.9	59.1	0
S	134	Q	81.2	18.8	1
S	135	F	58.4	41.6	0
S	136	C	36.4	63.6	2
S	137	N	85.2	14.8	0
S	138	D	77.6	22.4	2
S	139	P	40.8	59.2	0
S	140	F	68.3	31.7	1
S	141	L	70.6	29.4	1
S	142	G	83.5	16.5	4
S	143	V	57.3	42.7	1
S	144	Y	81.8	18.2	2
S	145	Y	86.3	13.7	2
S	146	H	100	0	4
S	147	K	100	0	1
S	148	N	96.3	3.7	4
S	149	N	97.2	2.8	2
S	150	K	96.2	3.8	1
S	151	S	97.3	2.7	3
S	152	W	62.9	37.1	2
S	153	M	75.9	24.1	3
S	154	E	77.9	22.1	2
S	155	S	90.3	9.7	2
S	156	E	92.5	7.5	4
S	157	F	85.3	14.7	2
S	158	R	93.9	6.1	2
S	159	V	73.1	26.9	1
S	160	Y	68.6	31.4	0
S	161	S	88.2	11.8	1
S	162	S	81.5	18.5	1
S	163	A	64.3	35.7	1
S	164	N	80.5	19.5	1
S	165	N	46.1	53.9	1
S	166	C	41.2	58.8	0
S	167	T	41.8	58.2	0
S	168	F	60.1	39.9	0
S	169	E	76.1	23.9	0
S	170	Y	66.3	33.7	0
S	171	V	77.7	22.3	1
S	172	S	84.1	15.9	1
S	173	Q	83.7	16.3	2
S	174	P	88.7	11.3	0
S	175	F	60.6	39.4	0
S	176	L	89.7	10.3	2
S	177	M	73.9	26.1	3
S	178	D	71.8	28.2	2
S	179	L	83.7	16.3	2
S	180	E	89.8	10.2	3
S	181	G	83.6	16.4	3
S	182	K	82.1	17.9	3
S	183	Q	90	10	3
S	184	G	36.1	63.9	1
S	185	N	50.7	49.3	3
S	186	F	33.4	66.6	1
S	187	K	64.4	35.6	0
S	188	N	65.2	34.8	3
S	189	L	34.9	65.1	1
S	190	R	77.3	22.7	2
S	191	E	29	71	0
S	192	F	72.7	27.3	0
S	193	V	76.2	23.8	1
S	194	F	40.1	59.9	0
S	195	K	74.5	25.5	0
S	196	N	57	43	0
S	197	I	90.3	9.7	2
S	198	D	50.5	49.5	1
S	199	G	40.1	59.9	0
S	200	Y	69	31	0
S	201	F	57.3	42.7	0
S	202	K	90.5	9.5	1
S	203	I	84.8	15.2	1
S	204	Y	49.4	50.6	0
S	205	S	88.4	11.6	0
S	206	K	89.2	10.8	1
S	207	H	90.6	9.4	0
S	208	T	83	17	1
S	209	P	83	17	0
S	210	I	82.8	17.2	0
S	211	N	94.9	5.1	2
S	212	L	92.7	7.3	1
S	213	V	94.1	5.9	2
S	214	R	87.8	12.2	2
S	215	D	87.9	12.1	5
S	216	L	84.6	15.4	1
S	217	P	69.1	30.9	2
S	218	Q	96.9	3.1	4
S	219	G	87	13	1
S	220	F	68.2	31.8	2
S	221	S	86.6	13.4	2
S	222	A	86.7	13.3	3
S	223	L	70.2	29.8	0
S	224	E	88.6	11.4	1
S	225	P	71.5	28.5	0
S	226	L	84.2	15.8	1
S	227	V	87.5	12.5	1
S	228	D	82.9	17.1	2
S	229	L	65.7	34.3	1
S	230	P	59.2	40.8	0
S	231	I	83.4	16.6	2
S	232	G	57.5	42.5	0
S	233	I	85.5	14.5	2
S	234	N	60.6	39.4	0
S	235	I	65.8	34.2	0
S	236	T	75.1	24.9	0
S	237	R	95.2	4.8	1
S	238	F	87.6	12.4	0
S	239	Q	80.9	19.1	2
S	240	T	83.8	16.2	2
S	241	L	86.1	13.9	0
S	242	L	78.2	21.8	2
S	243	A	87	13	3
S	244	L	92	8	1
S	245	H	92.4	7.6	2
S	246	R	84.5	15.5	3
S	247	S	98.1	1.9	2
S	248	Y	100	0	2
S	249	L	100	0	2
S	250	T	100	0	1
S	251	P	100	0	2
S	252	G	100	0	2
S	253	D	97.6	2.4	2
S	254	S	96.5	3.5	1
S	255	S	96.8	3.2	2
S	256	S	96.7	3.3	2
S	257	G	97.3	2.7	3
S	258	W	93	7	3
S	259	T	96.4	3.6	0
S	260	A	98	2	2
S	261	G	95.1	4.9	5
S	262	A	93.2	6.8	2
S	263	A	73.8	26.2	3
S	264	A	40.3	59.7	1
S	265	Y	34.3	65.7	1
S	266	Y	41.5	58.5	1
S	267	V	65.4	34.6	1
S	268	G	28	72	1
S	269	Y	78.9	21.1	0
S	270	L	30.3	69.7	0
S	271	Q	79.1	20.9	1
S	272	P	91.3	8.7	1
S	273	R	86.6	13.4	2
S	274	T	45.4	54.6	0
S	275	F	50	50	0
S	276	L	31.4	68.6	1
S	277	L	34.6	65.4	0
S	278	K	88.8	11.2	0
S	279	Y	26.7	73.3	0
S	280	N	70.3	29.7	0
S	281	E	78.8	21.2	2
S	282	N	67.2	32.8	0
S	283	G	11.9	88.1	0
S	284	T	65	35	1
S	285	I	34.2	65.8	0
S	286	T	91.2	8.8	1
S	287	D	74.6	25.4	1
S	288	A	30.6	69.4	2
S	289	V	72.8	27.2	2
S	290	D	26.6	73.4	1
S	291	C	6.4	93.6	0
S	292	A	51.5	48.5	1
S	293	L	89.4	10.6	0
S	294	D	62.5	37.5	0
S	295	P	29.8	70.2	0
S	296	L	68.5	31.5	1
S	297	S	76.9	23.1	1
S	298	E	13.1	86.9	1
S	299	T	14.1	85.9	1
S	300	K	73.8	26.2	0
S	301	C	5.5	94.5	1
S	302	T	45.6	54.4	1
S	303	L	58	42	1
S	304	K	42.9	57.1	2
S	305	S	72.2	27.8	0
S	306	F	21.9	78.1	1
S	307	T	90.8	9.2	4
S	308	V	40.8	59.2	2
S	309	E	92.2	7.8	2
S	310	K	61	39	0
S	311	G	5.5	94.5	0
S	312	I	15.9	84.1	1
S	313	Y	5.5	94.5	0
S	314	Q	37.1	62.9	4
S	315	T	31.8	68.2	1
S	316	S	10.6	89.4	0
S	317	N	31.5	68.5	0
S	318	F	29.7	70.3	1
S	319	R	22.8	77.2	0
S	320	V	25.6	74.4	2
S	321	Q	94.4	5.6	1
S	322	P	51	49	0
S	323	T	88	12	1
S	324	E	84.7	15.3	0
S	325	S	94	6	1
S	326	I	41	59	0
S	327	V	68.3	31.7	0
S	328	R	46	54	0
S	329	F	49.3	50.7	0
S	330	P	75.2	24.8	3
S	331	N	79.3	20.7	0
S	332	I	80.4	19.6	0
S	333	T	93.2	6.8	0
S	334	N	80	20	0
S	335	L	85.5	14.5	0
S	336	C	22.2	77.8	0
S	337	P	53.3	46.7	2
S	338	F	28.7	71.3	1
S	339	G	90.7	9.3	1
S	340	E	94.7	5.3	1
S	341	V	60.7	39.3	1
S	342	F	75.3	24.7	0
S	343	N	87.2	12.8	0
S	344	A	62.5	37.5	2
S	345	T	84.4	15.6	1
S	346	R	63.2	36.8	2
S	347	F	22.5	77.5	0
S	348	A	12.5	87.5	2
S	349	S	71	29	0
S	350	V	35.6	64.4	0
S	351	Y	51.9	48.1	0
S	352	A	48.1	51.9	1
S	353	W	19.6	80.4	0
S	354	N	78.5	21.5	3
S	355	R	8.6	91.4	0
S	356	K	90.4	9.6	0
S	357	R	69	31	1
S	358	I	30.8	69.2	0
S	359	S	55.2	44.8	1
S	360	N	75.6	24.4	0
S	361	C	6.4	93.6	0
S	362	V	51.8	48.2	0
S	363	A	22.2	77.8	0
S	364	D	18.4	81.6	1
S	365	Y	27.4	72.6	1
S	366	S	76.7	23.3	0
S	367	V	62.2	37.8	1
S	368	L	41.9	58.1	1
S	369	Y	46.9	53.1	0
S	370	N	44.5	55.5	1
S	371	S	52.3	47.7	0
S	372	A	49.6	50.4	1
S	373	S	65.6	34.4	1
S	374	F	32.1	67.9	0
S	375	S	63.6	36.4	0
S	376	T	62.8	37.2	0
S	377	F	17.2	82.8	0
S	378	K	63.1	36.9	2
S	379	C	8.5	91.5	1
S	380	Y	71.6	28.4	0
S	381	G	27.3	72.7	0
S	382	V	50	50	2
S	383	S	24.8	75.2	0
S	384	P	20.9	79.1	2
S	385	T	81.6	18.4	1
S	386	K	57.9	42.1	0
S	387	L	18.9	81.1	0
S	388	N	54	46	0
S	389	D	61.2	38.8	0
S	390	L	31.7	68.3	0
S	391	C	5.7	94.3	0
S	392	F	20.2	79.8	0
S	393	T	55	45	1
S	394	N	61	39	0
S	395	V	18.7	81.3	1
S	396	Y	45.2	54.8	0
S	397	A	40.7	59.3	0
S	398	D	9.4	90.6	0
S	399	S	82.3	17.7	0
S	400	F	20.5	79.5	0
S	401	V	61.5	38.5	0
S	402	I	67.2	32.8	1
S	403	R	53.9	46.1	2
S	404	G	94.3	5.7	0
S	405	D	67.2	32.8	0
S	406	E	59.3	40.7	0
S	407	V	66.3	33.7	1
S	408	R	43.4	56.6	2
S	409	Q	43.2	56.8	0
S	410	I	72	28	0
S	411	A	69.4	30.6	2
S	412	P	73.4	26.6	0
S	413	G	62	38	1
S	414	Q	43.4	56.6	3
S	415	T	35.9	64.1	1
S	416	G	24.4	75.6	0
S	417	K	88.3	11.7	2
S	418	I	26.8	73.2	1
S	419	A	69.9	30.1	0
S	420	D	63.2	36.8	0
S	421	Y	31	69	0
S	422	N	5.7	94.3	0
S	423	Y	8.5	91.5	0
S	424	K	49	51	0
S	425	L	23.8	76.2	0
S	426	P	23.9	76.1	0
S	427	D	66.5	33.5	2
S	428	D	57.7	42.3	0
S	429	F	22.5	77.5	0
S	430	T	51.1	48.9	0
S	431	G	17.7	82.3	0
S	432	C	9.4	90.6	1
S	433	V	36.7	63.3	0
S	434	I	50.8	49.2	1
S	435	A	56.3	43.7	1
S	436	W	39.5	60.5	0
S	437	N	59.6	40.4	0
S	438	S	61.3	38.7	0
S	439	N	72.5	27.5	1
S	440	N	92.6	7.4	1
S	441	L	87.1	12.9	1
S	442	D	82.2	17.8	0
S	443	S	92.8	7.2	0
S	444	K	92.1	7.9	2
S	445	V	95.4	4.6	1
S	446	G	80.7	19.3	2
S	447	G	77.4	22.6	0
S	448	N	76.7	23.3	0
S	449	Y	89	11	0
S	450	N	95.1	4.9	1
S	451	Y	81.3	18.7	0
S	452	L	96.6	3.4	2
S	453	Y	79.2	20.8	1
S	454	R	61.7	38.3	0
S	455	L	89.9	10.1	1
S	456	F	93.1	6.9	1
S	457	R	66.8	33.2	1
S	458	K	90.1	9.9	2
S	459	S	94.7	5.3	2
S	460	N	67.9	32.1	1
S	461	L	47.2	52.8	0
S	462	K	95.4	4.6	0
S	463	P	62.3	37.7	1
S	464	F	74	26	0
S	465	E	72.1	27.9	0
S	466	R	63	37	0
S	467	D	65.8	34.2	0
S	468	I	87.4	12.6	2
S	469	S	77.2	22.8	2
S	470	T	81	19	1
S	471	E	85.2	14.8	2
S	472	I	91.6	8.4	1
S	473	Y	87.4	12.6	0
S	474	Q	89.5	10.5	0
S	475	A	86.4	13.6	1
S	476	G	85.9	14.1	2
S	477	S	77.1	22.9	5
S	478	T	95.5	4.5	4
S	479	P	77.1	22.9	2
S	480	C	79.7	20.3	0
S	481	N	88.9	11.1	1
S	482	G	80.4	19.6	1
S	483	V	86	14	3
S	484	E	95.8	4.2	4
S	485	G	94.3	5.7	2
S	486	F	89.6	10.4	1
S	487	N	79	21	0
S	488	C	94.2	5.8	0
S	489	Y	94.6	5.4	0
S	490	F	98.2	1.8	3
S	491	P	97.1	2.9	0
S	492	L	58.8	41.2	0
S	493	Q	91	9	1
S	494	S	88.5	11.5	2
S	495	Y	70.4	29.6	0
S	496	G	70.9	29.1	0
S	497	F	70.6	29.4	0
S	498	Q	93.6	6.4	0
S	499	P	95.6	4.4	1
S	500	T	91.4	8.6	0
S	501	N	96	4	2
S	502	G	79.3	20.7	0
S	503	V	89.9	10.1	1
S	504	G	95.9	4.1	0
S	505	Y	81.9	18.1	1
S	506	Q	76	24	0
S	507	P	75.5	24.5	0
S	508	Y	76.3	23.7	1
S	509	R	32.9	67.1	1
S	510	V	55.3	44.7	1
S	511	V	44.5	55.5	0
S	512	V	37.7	62.3	0
S	513	L	18.4	81.6	0
S	514	S	38.3	61.7	1
S	515	F	35	65	0
S	516	E	59.4	40.6	1
S	517	L	34.8	65.2	0
S	518	L	39.8	60.2	1
S	519	H	58.1	41.9	2
S	520	A	41.7	58.3	2
S	521	P	74.5	25.5	2
S	522	A	71.7	28.3	2
S	523	T	39.7	60.3	1
S	524	V	10	90	0
S	525	C	10.4	89.6	0
S	526	G	18.9	81.1	0
S	527	P	73.4	26.6	0
S	528	K	71.5	28.5	0
S	529	K	60.9	39.1	2
S	530	S	52	48	0
S	531	T	39.4	60.6	0
S	532	N	96.2	3.8	0
S	533	L	82.6	17.4	0
S	534	V	81.9	18.1	1
S	535	K	68.9	31.1	0
S	536	N	77.5	22.5	0
S	537	K	85.8	14.2	0
S	538	C	5.5	94.5	0
S	539	V	23	77	0
S	540	N	58.7	41.3	0
S	541	F	16.2	83.8	0
S	542	N	40.5	59.5	0
S	543	F	41.4	58.6	0
S	544	N	38.3	61.7	0
S	545	G	9.4	90.6	1
S	546	L	58.9	41.1	0
S	547	T	68.7	31.3	2
S	548	G	8.5	91.5	0
S	549	T	37.2	62.8	1
S	550	G	5.5	94.5	0
S	551	V	10.1	89.9	0
S	552	L	31.1	68.9	1
S	553	T	65	35	2
S	554	E	96.5	3.5	5
S	555	S	24.4	75.6	0
S	556	N	71.6	28.4	2
S	557	K	59.1	40.9	0
S	558	K	80	20	3
S	559	F	52.5	47.5	0
S	560	L	64.1	35.9	0
S	561	P	80	20	2
S	562	F	57.1	42.9	0
S	563	Q	32	68	0
S	564	Q	35.3	64.7	0
S	565	F	13.6	86.4	2
S	566	G	36.3	63.7	1
S	567	R	39.6	60.4	1
S	568	D	62.7	37.3	0
S	569	I	91.8	8.2	0
S	570	A	68.4	31.6	4
S	571	D	27.8	72.2	1
S	572	T	39.9	60.1	1
S	573	T	30.4	69.6	2
S	574	D	66.9	33.1	2
S	575	A	50.1	49.9	1
S	576	V	45.8	54.2	1
S	577	R	57.7	42.3	0
S	578	D	44.1	55.9	0
S	579	P	61.6	38.4	2
S	580	Q	72.3	27.7	1
S	581	T	74.9	25.1	0
S	582	L	71.3	28.7	0
S	583	E	74.2	25.8	1
S	584	I	44.2	55.8	1
S	585	L	17	83	1
S	586	D	47.2	52.8	0
S	587	I	33.3	66.7	0
S	588	T	69.8	30.2	1
S	589	P	19	81	1
S	590	C	5.5	94.5	0
S	591	S	22.7	77.3	0
S	592	F	37.5	62.5	0
S	593	G	18.5	81.5	0
S	594	G	71.1	28.9	1
S	595	V	19.1	80.9	0
S	596	S	24.6	75.4	2
S	597	V	24.6	75.4	1
S	598	I	37.5	62.5	1
S	599	T	27.6	72.4	0
S	600	P	37.8	62.2	0
S	601	G	22.4	77.6	0
S	602	T	33.5	66.5	1
S	603	N	53.6	46.4	3
S	604	T	94	6	1
S	605	S	57.4	42.6	0
S	606	N	78.1	21.9	1
S	607	Q	90.2	9.8	1
S	608	V	51.3	48.7	0
S	609	A	21.4	78.6	0
S	610	V	21.6	78.4	0
S	611	L	23.3	76.7	1
S	612	Y	21.3	78.7	0
S	613	Q	37.9	62.1	1
S	614	D	27.2	72.8	2
S	615	V	17.5	82.5	4
S	616	N	66.6	33.4	1
S	617	C	5.5	94.5	0
S	618	T	83.2	16.8	2
S	619	E	76.4	23.6	1
S	620	V	36	64	1
S	621	P	88.1	11.9	2
S	622	V	76.5	23.5	4
S	623	A	70.1	29.9	2
S	624	I	65.9	34.1	0
S	625	H	87.7	12.3	2
S	626	A	74.8	25.2	2
S	627	D	64.5	35.5	3
S	628	Q	49.3	50.7	0
S	629	L	34.5	65.5	1
S	630	T	91.9	8.1	1
S	631	P	52.6	47.4	3
S	632	T	83.9	16.1	1
S	633	W	84.1	15.9	0
S	634	R	92.9	7.1	1
S	635	V	78.7	21.3	0
S	636	Y	68.2	31.8	0
S	637	S	94.5	5.5	0
S	638	T	77.5	22.5	2
S	639	G	79.4	20.6	1
S	640	S	97.8	2.2	2
S	641	N	92.9	7.1	0
S	642	V	60.5	39.5	2
S	643	F	53	47	1
S	644	Q	15.9	84.1	0
S	645	T	9.7	90.3	0
S	646	R	85.1	14.9	0
S	647	A	23.6	76.4	2
S	648	G	5.5	94.5	0
S	649	C	5.5	94.5	0
S	650	L	42.6	57.4	0
S	651	I	77	23	0
S	652	G	14.7	85.3	1
S	653	A	49.7	50.3	1
S	654	E	92.3	7.7	4
S	655	H	38.6	61.4	3
S	656	V	84	16	0
S	657	N	74.7	25.3	1
S	658	N	82.6	17.4	3
S	659	S	45.3	54.7	1
S	660	Y	71.3	28.7	1
S	661	E	80.3	19.7	1
S	662	C	6.4	93.6	0
[truncated: 7,707 more rows]
